# Supplementary material
Source: publisher figshare collection journal article supplement (https://tandf.figshare.com/ndownloader/files/12818429)
Supplement: Supplementary file 1 [file 12818429]

**Supplementary Material**

Manganese(III) porphyrins with oxidation properties

NIHARIKA ANAND and SUDHA YADAVA*


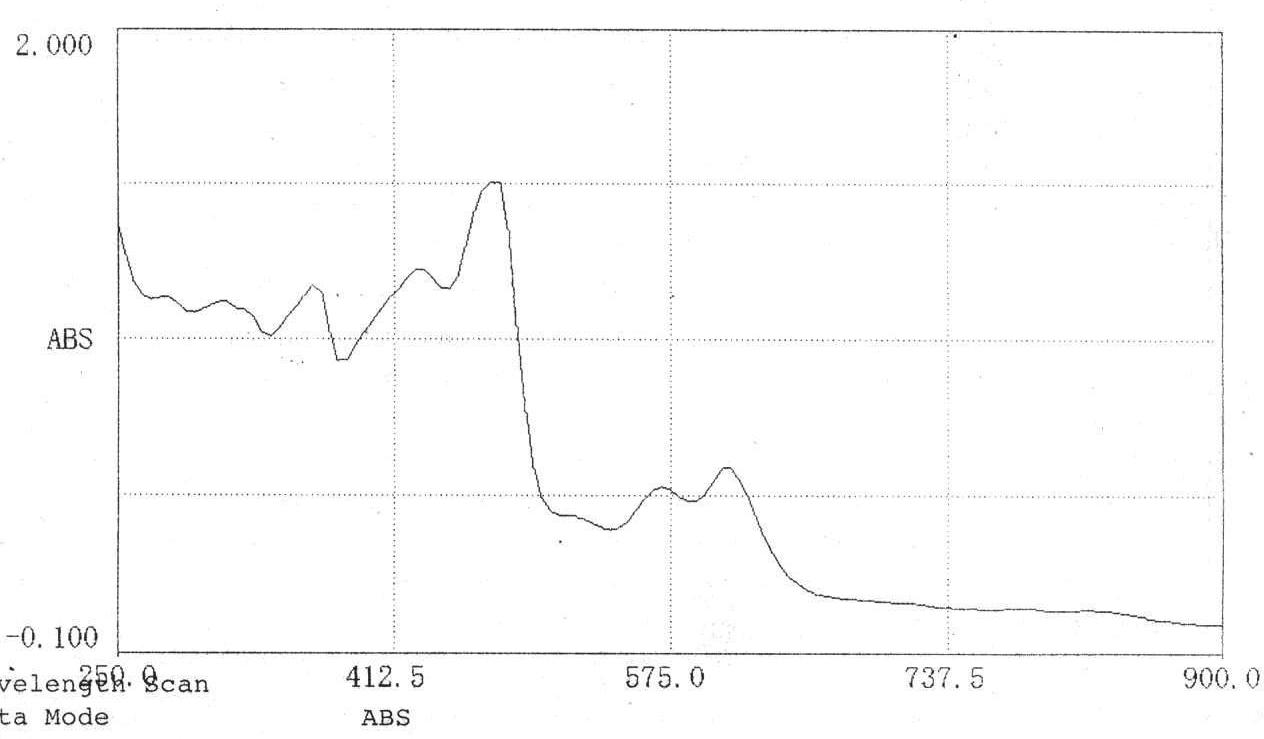


Figure 1. UV-visible spectrum of Mn(THMPP)Cl(4-MeIm).


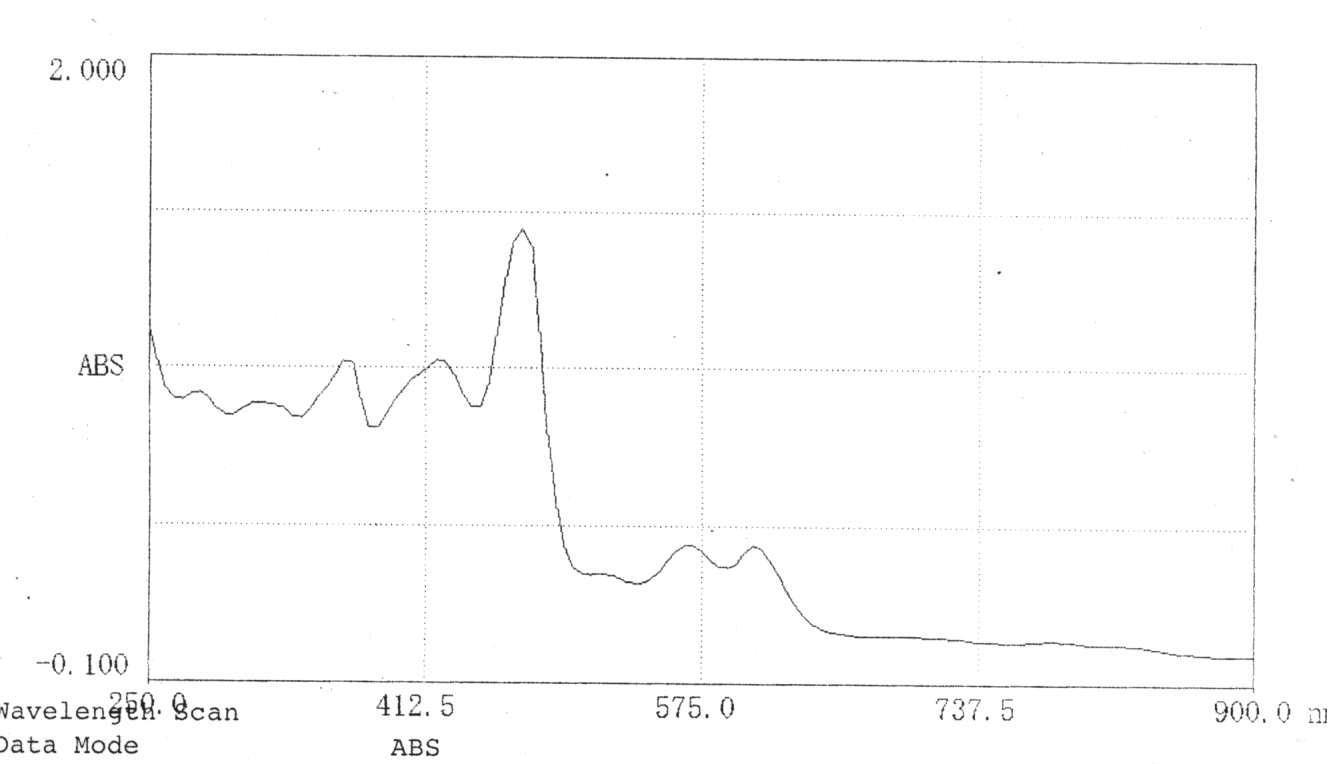


Figure 2. UV-visible spectrum of Mn(THMPP)Br(4-MeIm).


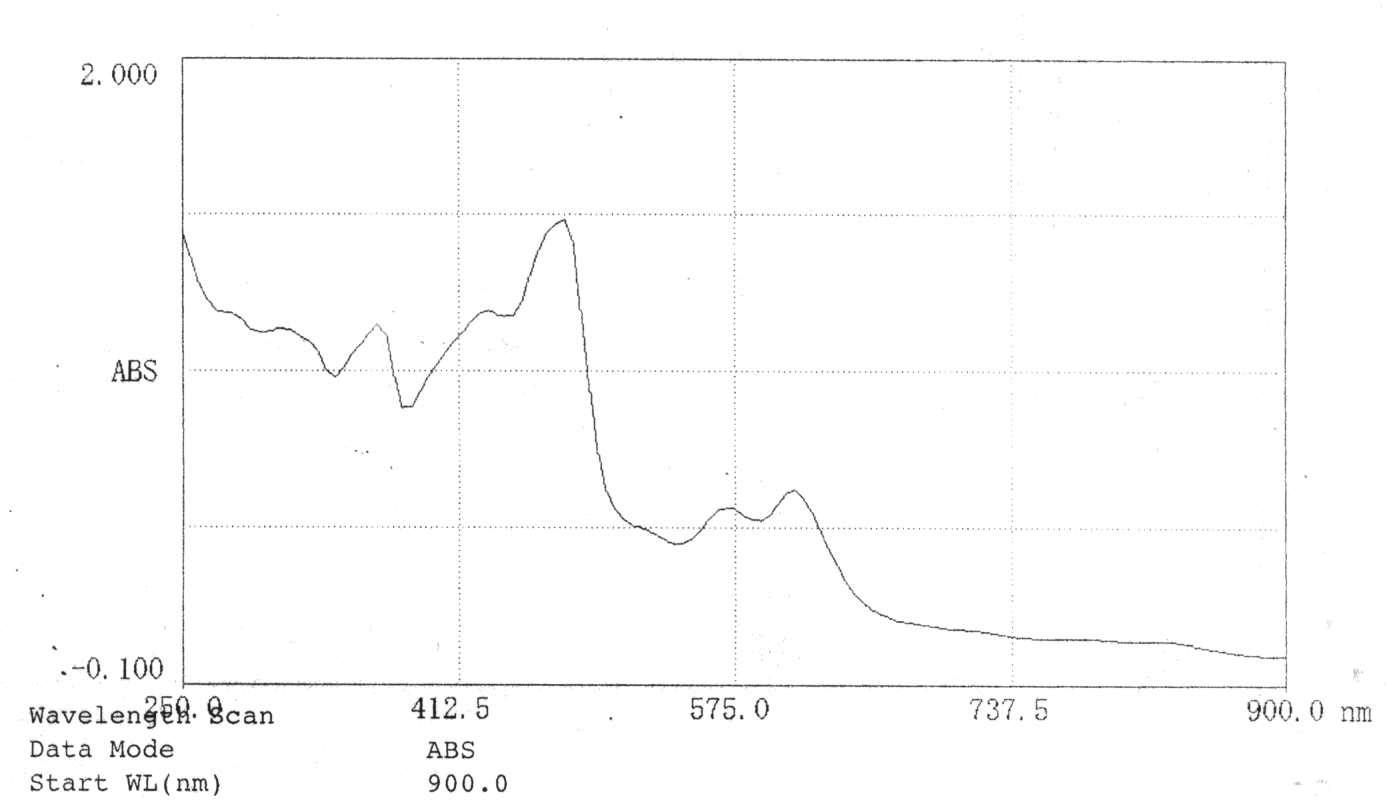


Figure 3. UV-visible spectrum of Mn(THMPP)N3(4-MeIm).


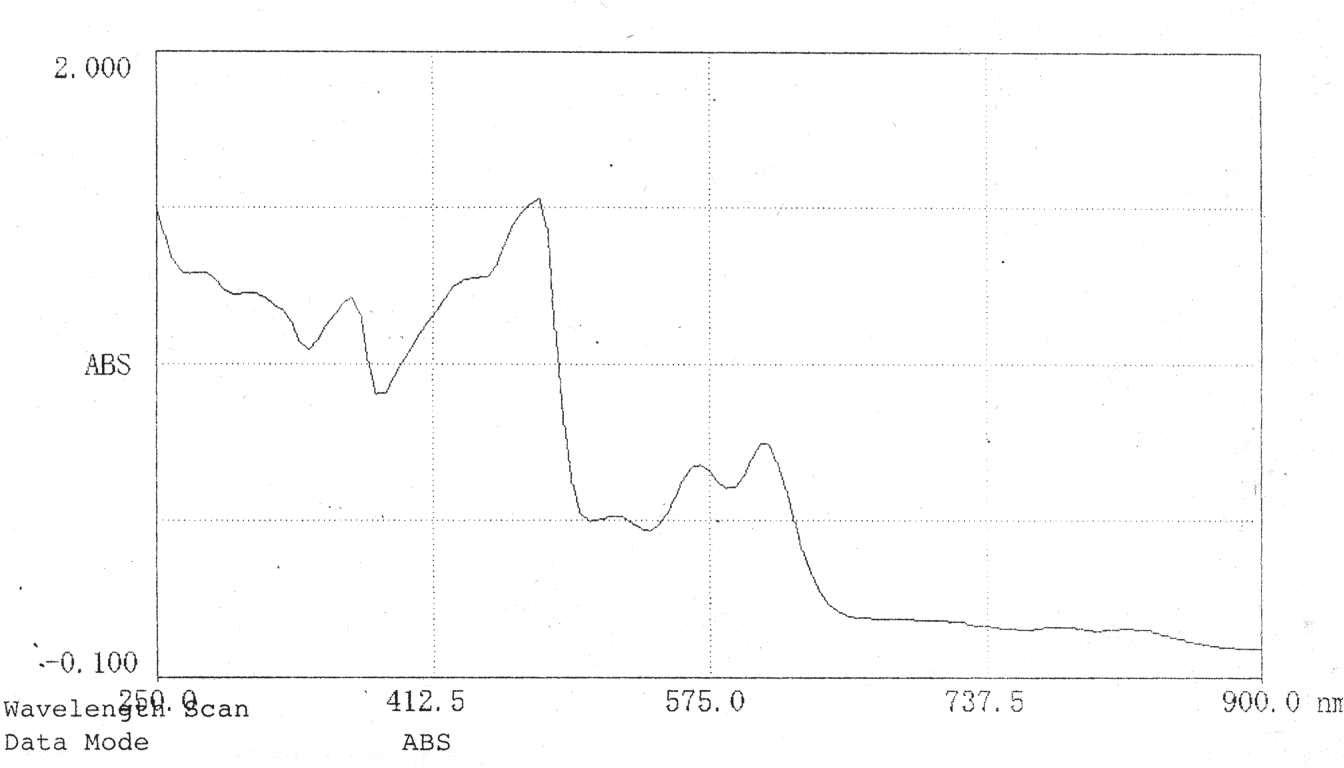


Figure 4. UV-visible spectrum of Mn(THMPP)NCS(4-MeIm).


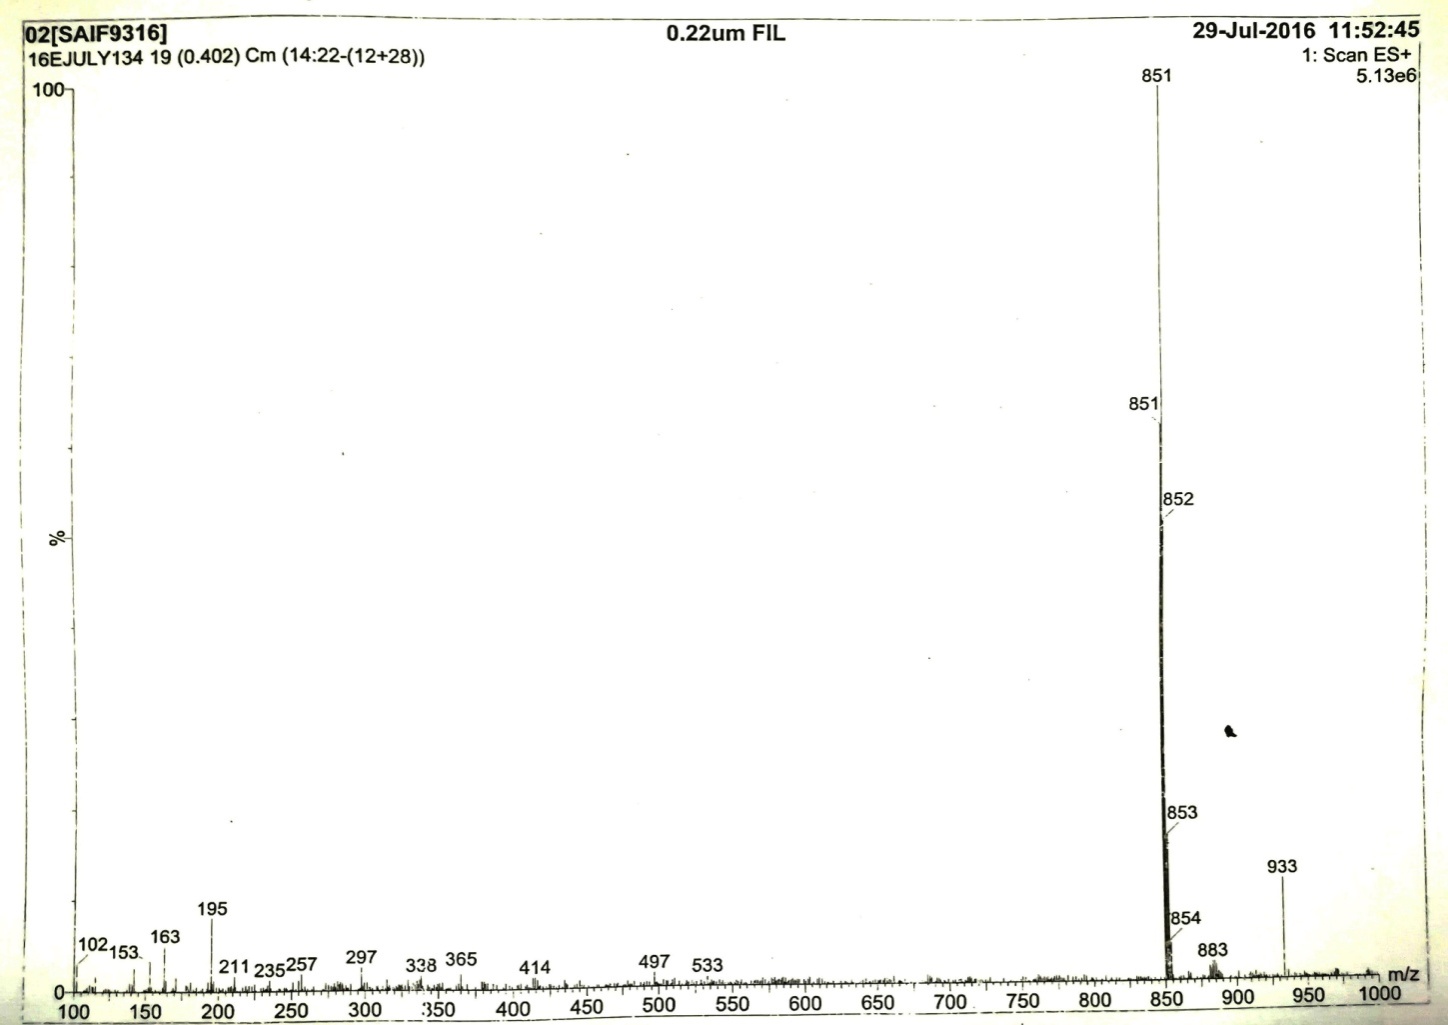


Figure 5. ESI-MS of Mn(THMPP)Cl(4-MeIm).


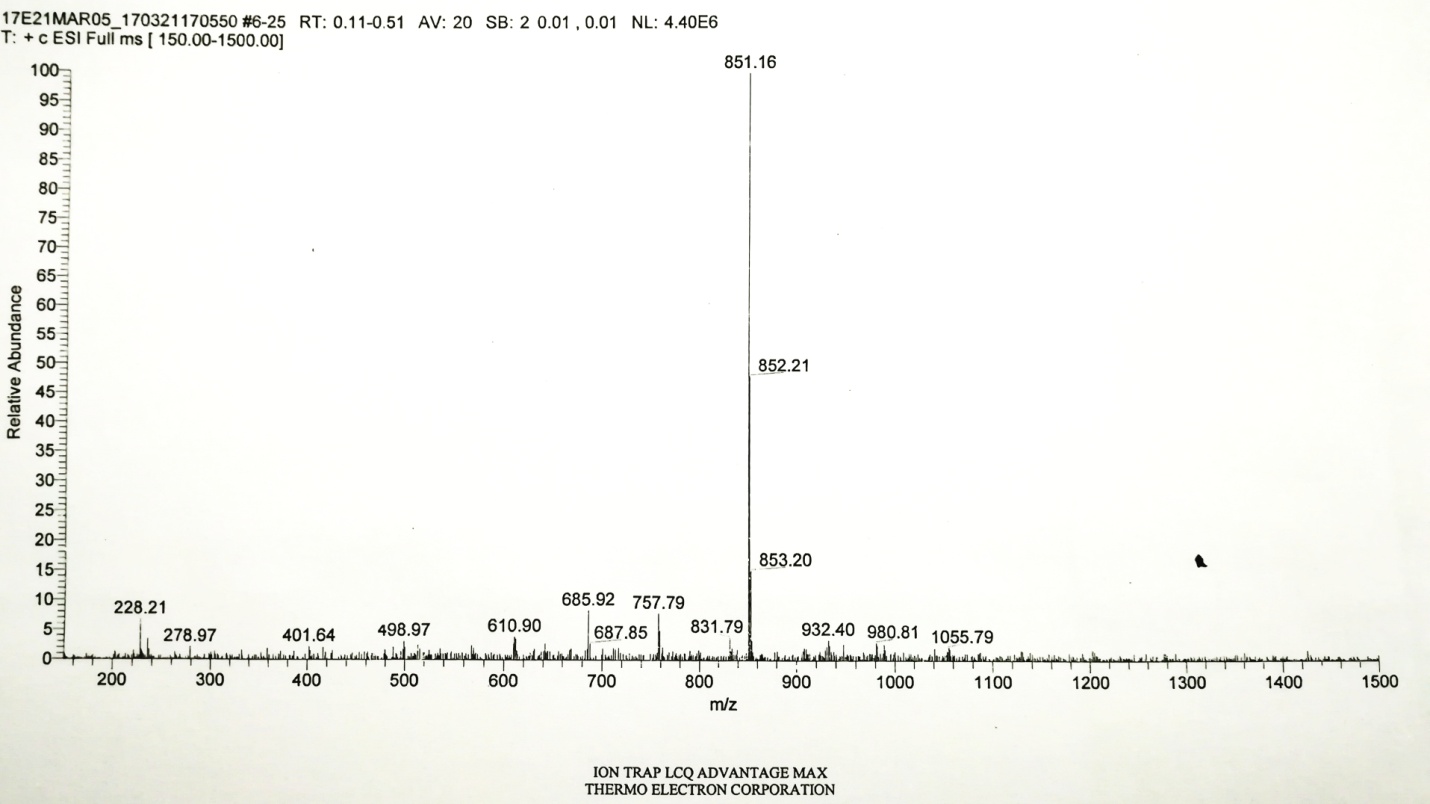


Figure 6. ESI-MS of Mn(THMPP)Br(4-MeIm).


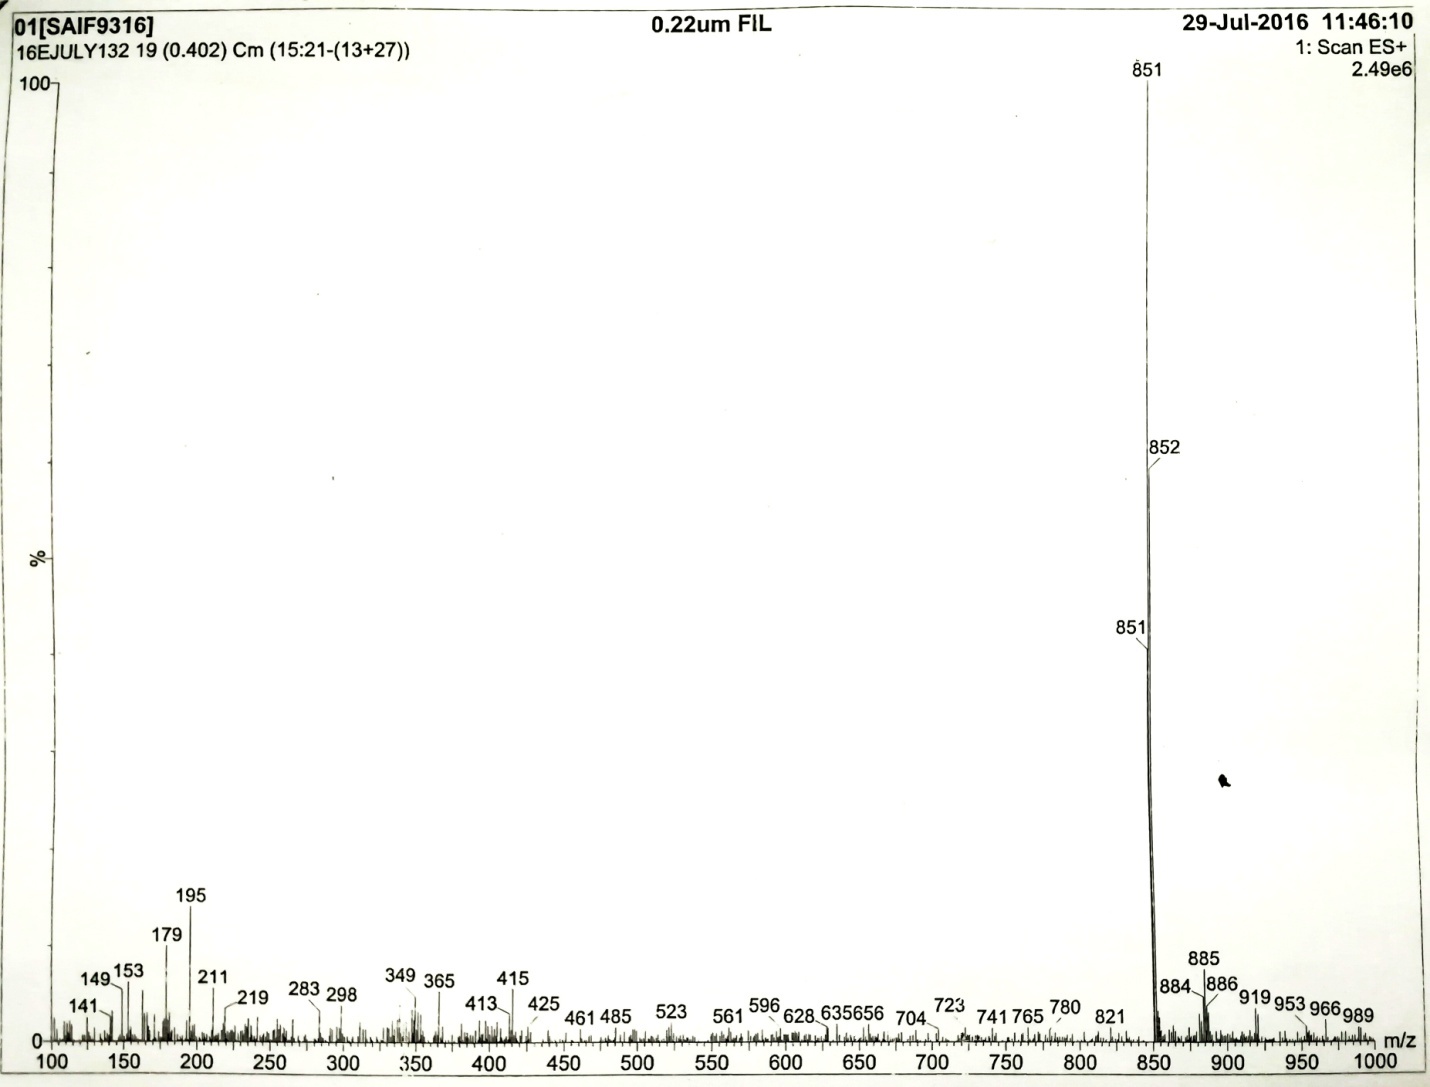


Figure 7. ESI-MS of Mn(THMPP)N3(4-MeIm).

**
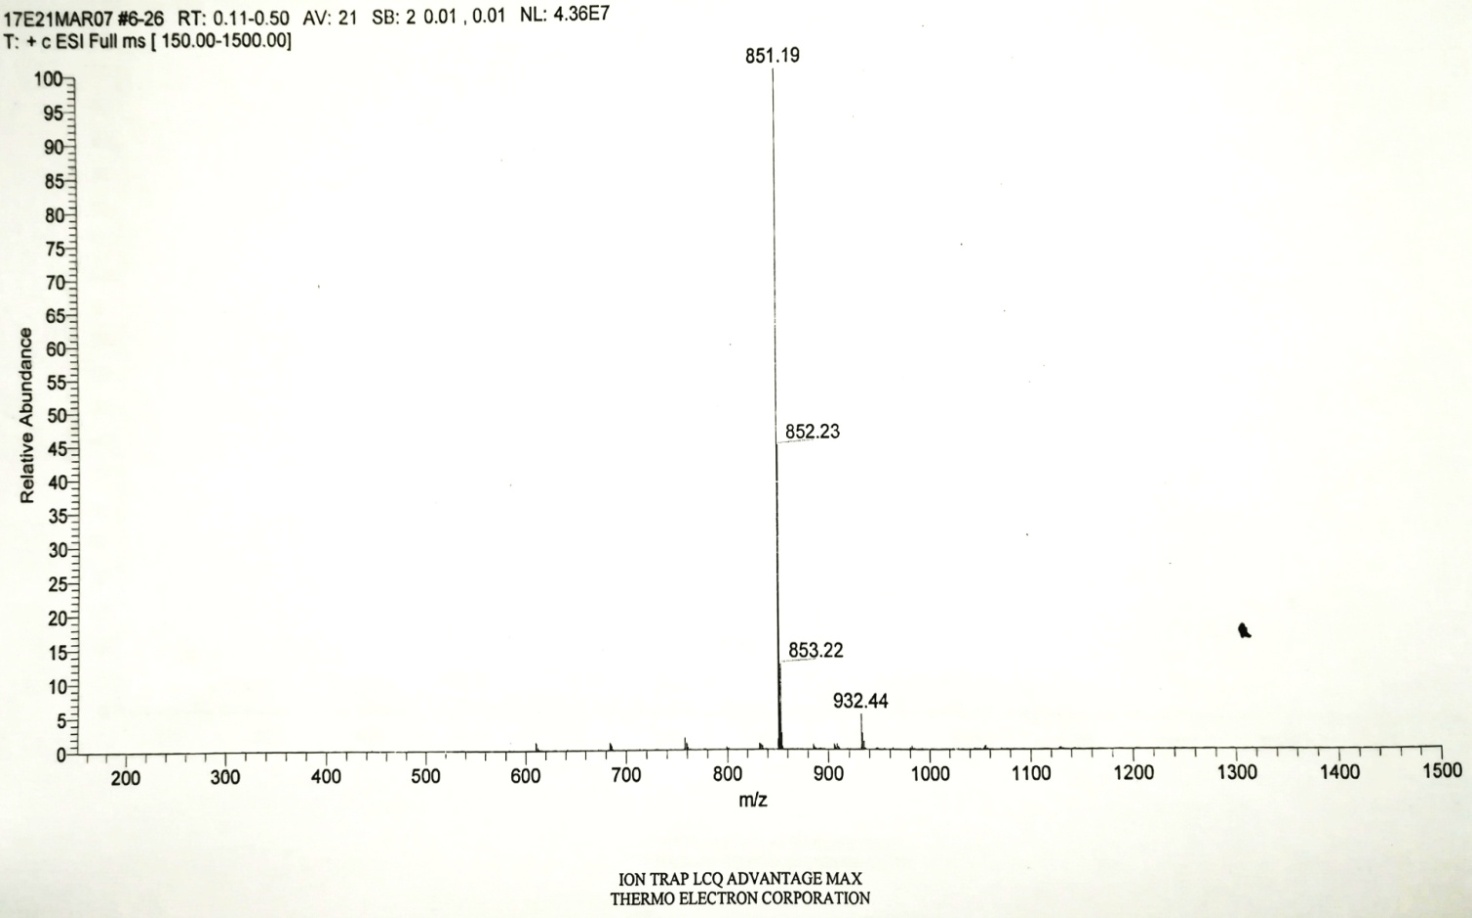
**

Figure 8. ESI-MS of Mn(THMPP)NCS(4-MeIm).
